# Supplementary material for: Hydroxy Selenomethionine Improves Meat Quality through Optimal Skeletal Metabolism and Functions of Selenoproteins of Pigs under Chronic Heat Stress
Source: MDPI journal article supplement (doi:10.3390/antiox10101558), 2021-09-29
Supplement: s1 [file s1]

**Supporting Table S1.** Primers used for the q-PCR of the target and reference genes

| Protein                             | Gene           | Accession number | Primer sequence (from 5' to 3')                          |
|-------------------------------------|----------------|------------------|----------------------------------------------------------|
| <b>Selenoprotein encoding genes</b> |                |                  |                                                          |
| DIO1                                | <i>DIO1</i>    | AY533206         | F: CATGGCCAAGAACCCTCACT<br>R: CCAGAAATACTGGGCACTGAAGA    |
| DIO2                                | <i>DIO2</i>    | AY533207         | F: CGCTGCATCTGGAAGAGCTT<br>R: TGGAATTGGGTGCATCTTCA       |
| DIO3                                | <i>DIO3</i>    | AY533208         | F: TGAAGTGGAGCTCAACAGTGATG<br>R: TGTCGTCAGACACGCAGATAGG  |
| GPX1                                | <i>GPX1</i>    | AF532927         | F: GATGCCACTGCCCTCATGA<br>R: TCGAAGTTCCATGCGATGTC        |
| GPX2                                | <i>GPX2</i>    | DQ898282         | F: AGAATGTGGCCTCGCTCTGA<br>R: GGCATTGCAGCTCGTTGAG        |
| GPX3                                | <i>GPX3</i>    | AY368622         | F: CCGGTTCTGTCTTTCCAAATT<br>R: TGCACTGCAGGAAGAGTTTGAA    |
| GPX4                                | <i>GPX4</i>    | NM_214407        | F: TGAGGCAAGACGGAGGTAAACT<br>R: TCCGTAAACCACACTCAGCATATC |
| GPX6                                | <i>GPX6</i>    | NM_001137607     | F: GAGCTGAAGCCTTTTGGTGTAGTT<br>R: CTTTGCTGGTTCTTGTTTTCCA |
| MSRB1                               | <i>MSRB1</i>   | EF113597         | F: ATCCCTAAAGGCCAAGAATCATC<br>R: GGCCACCAAGCAGTGTTCA     |
| SELENOF                             | <i>SELENOF</i> | EF178474         | F: ACAGCCCTGCCAAGCAGAT<br>R: AACAGGGAGGCTGGGTAACAC       |
| SELENOH                             | <i>SELENOH</i> | HM018602         | F: TGGTGGAGGAGCTGAAGAAGTAC<br>R: CGTCATAAATGCTCCAACATCAC |
| SELENOI                             | <i>SELENOI</i> | NM_001244662.1   | F: GATGGTGTGGATGGAAAGCAA<br>R: GCCATGGTCAAAGAGTTCTCCTA   |
| SELENOK                             | <i>SELENOK</i> | DQ372075         | F: CAGGAAACCCCCCTAGAAGAA<br>R: CTCATCCACCGGCCATTG        |

|         |                |           |                                                          |
|---------|----------------|-----------|----------------------------------------------------------|
| SELENOM | <i>SELENOM</i> | FJ968780  | F: CAGCTGAATCGCCTCAAAGAG<br>R: GAGATGTTTCATGACCAGGTTGTG  |
| SELENON | <i>SELENON</i> | EF113595  | F: ACCTGGTCCCTGGTGAAAGAG<br>R: AGGCCAGCCAGCTTCTTGT       |
| SELENOO | <i>SELENOO</i> | AK236851  | F: CTTCCGACCCCAGATGGAT<br>R: GGTTCGACTGTGCCAGCAT         |
| SELENOP | <i>SELENOP</i> | EF113596  | F: AACCAGAAGCGCCAGACACT<br>R: TGCTGGCATATCTCAGTTCTCAGA   |
| SELENOS | <i>SELENOS</i> | AY609646  | F: GAGGCAGAGGCACCTGGAT<br>R: CTGCTAAAGCCTCCTGTCGTTT      |
| SELENOT | <i>SELENOT</i> | AY609428  | F: GGCTTAATAATCGTTGGCAAAGA<br>R: TGGCCCCATTGCCAGATA      |
| SELENOV | <i>SELENOV</i> | GQ478346  | F: CACTGGTCGCCAATGGATTC<br>R: AGTGGCCAACGGAGAAAGC        |
| SELENOW | <i>SELENOW</i> | NM_213977 | F: CACCCCTGTCTCCCTGCAT<br>R: GAGCAGGATCACCCCAAACA        |
| SEPHS2  | <i>SEPHS2</i>  | EF033624  | F: TGGCTTGATGCACACGTTTAA<br>R: TGCAGGTGTCCCAGAATGC       |
| TXNRD1  | <i>TXNRD1</i>  | AF537300  | F: GATTTAACAAGCGGGTCATGGT<br>R: CAACCTACATTACACACGTTTCCT |
| TXNRD2  | <i>TXNRD2</i>  | GU181287  | F: TCTTGAAAGGCGGAAAAGAGAT<br>R: TCGGTCGCCCTCCAGTAG       |
| TXNRD3  | <i>TXNRD3</i>  | BX918808  | F: GTGCCCTACGTTTATGCTGTTG<br>R: TCCGAGCCACCAGCTTTG       |

#### Metabolism-related genes

|                 |                                 |                |                                                      |
|-----------------|---------------------------------|----------------|------------------------------------------------------|
| AMPK $\alpha$ 1 | <i>AMPK<math>\alpha</math>1</i> | NM_001167633.1 | F: TTGACTCGGCCCCATCCT<br>R: GTATGGCGTGCCCTTGGA       |
| GCK             | <i>GCK</i>                      | XM_013985832.2 | F: GTGGTGGCAATGGTGAATGAC<br>R: TCGGCGGTCTTCATAGTAGCA |

|                                   |                |                |                                                          |
|-----------------------------------|----------------|----------------|----------------------------------------------------------|
| PCK2                              | <i>PCK2</i>    | NM_001161753.1 | F: GCCCTTCTTCGGCTACAACCTTT<br>R: CCTTGCGCCCCCTCCAT       |
| INSR                              | <i>INSR</i>    | AF102858.1     | F: CCAAAGGCCAGCCAACACT<br>R: GGGAACGCAGGTAACCTCTTTAAGTC  |
| AKT1                              | <i>AKT1</i>    | NM_001159776.1 | F: AGAACCGCGTCCTCCAGAA<br>R: CGTGGGTCTGGAAGGAGTACTTC     |
| SREBF1                            | <i>SREBF1</i>  | NM_214157.1    | F: GCTGAATAAATCCGCCGTCTT<br>R: CTGGTTGCTCTGCTGAAGGAA     |
| ACC1                              | <i>ACC1</i>    | XM_021066238.1 | F: CAAGACCACCAACGCGAAA<br>R: GGCAAATGGGAGGCAATAAGA       |
| PPARG                             | <i>PPARG</i>   | NM_214379.1    | F: TGCCACAGGCTGAGAAGGA<br>R: GGGTTCAGCTGGTCGATATCAC      |
| FASN                              | <i>FASN</i>    | NM_001099930.1 | F: GTGGGTGTGAGCAGTTCTGATG<br>R: GCCCCTTGAAGTCAAAGAAGAAG  |
| mTOR                              | <i>mTOR</i>    | XM_003127584.6 | F: GGACACAAACACCAAAGGTAACAAG<br>R: GTGGTCCCCGTTTTCTTATGG |
| 4E-BP1                            | <i>4E-BP1</i>  | NM_001244225.1 | F: CCCCCTGCTTCCTCACTCA<br>R: TGGAGGTATCTGCTGGTGTTC       |
| <b>Housekeeping control genes</b> |                |                |                                                          |
| β-ACTIN                           | <i>β-ACTIN</i> | NM_007393.5    | F: ACCAGTTCGCCATGGATGAC<br>R: TGCCGGAGCCGTTGTC           |
| GAPDH                             | <i>GAPDH</i>   | GU214026.1     | F: GGGAAGCCCATCACCATCT<br>R: CGGCCTCACCCCATTTG           |

---
